# Supplementary material for: A GP1BA Variant in a Czech Family with Monoallelic Bernard-Soulier Syndrome
Source: MDPI journal article supplement (doi:10.3390/ijms23020885), 2022-01-14
Supplement: s1 [file s1]

## Supplementary Material

**Table S1.** Bleeding questionnaire and bleeding scores for the patients II-1, II-2, and III-1 with BSS according to [17].

| Symptom                    | -1                                    | 0                                        | 1                              | 2                                    | 3                                                         | 4                                                                              | Score II-1 | Score II-2 | Score III-1 |
|----------------------------|---------------------------------------|------------------------------------------|--------------------------------|--------------------------------------|-----------------------------------------------------------|--------------------------------------------------------------------------------|------------|------------|-------------|
| Epistaxis                  | -                                     | No or trivial (<5)                       | >5 OR more than 10'            | Consultation only                    | Packing or cauterization or antifibrinolytics             | Blood transfusion or replacement therapy                                       | 3          | 1          | 1           |
| Cutaneous                  | -                                     | No or trivial (<1cm)                     | >1cm AND no trauma             | Consultation only                    |                                                           |                                                                                | N/A        | N/A        | N/A         |
| Bleeding from minor wounds | -                                     | No or trivial (<5)                       | > 5 OR more than 5'            | Consultation only or sterile strips  | Surgical hemostasis or antifibrinolytics                  | Blood transfusion or replacement therapy                                       | 1          | 1          | 1           |
| Oral Cavity                | -                                     | No                                       | Reported at least one          | Consultation only                    | Surgical hemostasis or antifibrinolytics                  | Blood transfusion or Replacement therapy                                       | 1          | 1          | N/A         |
| GI Bleeding                | -                                     | No                                       | Identified cause               | Consultation or Spontaneous          | Surgical hemostasis, antifibrinolytics, blood transfusion | Replacement therapy                                                            | N/A        | N/A        | N/A         |
| Tooth extraction           | No bleeding in at least 2 extractions | None done, No bleeding in 1              | Reported, no consultation      | Consultation only                    | Resuturing, repacking or antifibrinolytics                | Blood transfusion or Replacement therapy                                       | 1          | 1          | 1           |
| Surgery                    | No bleeding in 2 surgeries            | None done, No bleeding in 1              | Reported, no consultation      | Consultation only                    | Surgical hemostasis or antifibrinolytics                  | Blood transfusion or Replacement therapy                                       | N/A        | N/A        | N/A         |
| Menorrhagia                | -                                     | No                                       | Reported, or consultation only | Antifibrinolytics or Pill use        | D&C, Iron therapy                                         | Blood transfusion or Replacement therapy or Hysterectomy                       | N/A        | 1          | N/A         |
| Post-partum hemorrhage     | No bleeding in at least 2 deliveries  | No deliveries, No bleeding in 1 delivery | Reported, or consultation only | D&C, Iron therapy, Antifibrinolytics | Blood transfusion or replacement therapy                  | Hysterectomy                                                                   | N/A        | N/A        | N/A         |
| Muscle hematomas           | -                                     | Never                                    | Post trauma no therapy         | Spontaneous no therapy               | Spontaneous or traumatic, requiring replacement therapy   | Spontaneous or traumatic, requiring surgical intervention or blood transfusion | N/A        | N/A        | N/A         |
| Hemarthrosis               | -                                     | Never                                    | Post trauma no therapy         | Spontaneous no therapy               | Spontaneous or traumatic, requiring replacement therapy   | Spontaneous or traumatic, requiring surgical intervention or blood transfusion | N/A        | N/A        | N/A         |
| CNS Bleeding               | -                                     | Never                                    | -                              | -                                    | Subdural, any intervention                                | Intracerebral, any intervention                                                | N/A        | N/A        | N/A         |
| -                          | -                                     | -                                        | -                              | -                                    | -                                                         | <b>Bleeding score:</b>                                                         | <b>6</b>   | <b>5</b>   | <b>3</b>    |

Not Available (N/A)

**Table S2.** Heterozygous gene variants from WES analysis filtered for the macrothrombocytopenia phenotype. Reference genome: GRCh38; variants and indels were filtered for coding regions and splice sites; minimal coverage 15×. These gene variants were identified in both patients (II-1, II-2), which were completely absent in healthy individuals (III-2, III-3).

| Genomic coordinate | Gene            | RefSeq       | cDNA             | Protein    | II-1 VAF [%] | II-2 VAF [%] |
|--------------------|-----------------|--------------|------------------|------------|--------------|--------------|
| 62728902           | <i>KANK4</i>    | NM_001320269 | c.517T>C         | p.Y173H    | 52.94        | 40.00        |
| 145608556          | <i>POLR3C</i>   | NM_001303456 | c.290G>A         | p.R97Q     | 39.02        | 35.29        |
| 148004763          | <i>NBPF26</i>   | NM_001351372 | c.3796G>A        | p.E1266K   | 41.07        | 46.15        |
| 153012650          | <i>SPRR2D</i>   | NM_006945    | c.173C>T         | p.T58I     | 41.03        | 55.56        |
| 153430347          | <i>S100A7</i>   | NM_002963    | c.241G>T         | p.D81Y     | 58.62        | 58.33        |
| 156106994          | <i>LMNA</i>     | NM_001282625 | c.1579C>T        | p.R527C    | 93.40        | 55.38        |
| 161332307          | <i>SDHC</i>     | NM_001035511 | c.430G>C         | p.E144Q    | 37.93        | 48.84        |
| 201179738          | <i>IGFN1</i>    | NM_001164586 | c.5717C>A        | p.A1906E   | 46.67        | 30.77        |
| 43768308           | <i>THADA</i>    | NM_001345925 | c.3254C>T        | p.T1085M   | 50.00        | 42.50        |
| 54120827           | <i>PSME4</i>    | NM_014614    | c.4022G>A        | p.R1341H   | 62.86        | 37.50        |
| 54155315           | <i>PSME4</i>    | NM_014614    | c.1442T>C        | p.M481T    | 43.82        | 50.00        |
| 152404198          | <i>NEB</i>      | NM_001164507 | c.20212G>A       | p.D6738N   | 63.04        | 55.88        |
| 152404248          | <i>NEB</i>      | NM_001164507 | c.20162T>C       | p.L6721P   | 56.76        | 57.14        |
| 152530992          | <i>NEB</i>      | NM_001164507 | c.3986A>C        | p.D1329A   | 50.00        | 43.55        |
| 160634452          | <i>CD302</i>    | NM_001198759 | c.5416T>C        | p.S1806P   | 31.25        | 56.25        |
| 186653566          | <i>FSIP2</i>    | NM_173651    | c.1703A>T        | p.Y568F    | 51.14        | 61.54        |
| 186665996          | <i>FSIP2</i>    | NM_173651    | c.11963C>T       | p.S3988F   | 43.24        | 52.73        |
| 13600704           | <i>BOD1L1</i>   | NM_148894    | c.7820A>T        | p.N2607I   | 50.91        | 36.00        |
| 47574926           | <i>ATP10D</i>   | NM_020453    | c.3278A>G        | p.K1093R   | 47.06        | 30.43        |
| 62812764           | <i>ADGRL3</i>   | NM_001322402 | c.2552C>T        | p.T851M    | 54.43        | 43.75        |
| 88084724           | <i>KLHL8</i>    | NM_001292003 | c.1807_1810del   | p.T603fs   | 46.30        | 51.61        |
| 108868556          | <i>CYP2U1</i>   | NM_183075    | c.1151G>T        | p.R384I    | 51.46        | 44.44        |
| 155533337          | <i>FGG</i>      | NM_000509    | c.140C>T         | p.T47I     | 39.02        | 60.71        |
| 54786796           | <i>PLPP1</i>    | NM_176895    | c.205A>G         | p.I69V     | 77.78        | 46.88        |
| 74412411           | <i>ANKRD31</i>  | NM_001164443 | c.3964T>C        | p.S1322P   | 54.10        | 43.33        |
| 79616698           | <i>SPZ1</i>     | NM_032567    | c.664G>A         | p.E222K    | 45.83        | 50.00        |
| 151180378          | <i>G3BP1</i>    | NM_198395    | c.1142G>A        | p.G381D    | 37.84        | 46.81        |
| 42858231           | <i>C6orf226</i> | NM_001008739 | c.296T>G         | p.V99G     | 39.13        | 30.77        |
| 42931129           | <i>GNMT</i>     | NM_018960    | c.658A>T         | p.T220S    | 47.73        | 39.29        |
| 76023429           | <i>FILIP1</i>   | NM_001289987 | c.2127_2128insGG | p.R710fs   | 55.21        | 52.27        |
| 17379805           | <i>AHR</i>      | NM_001621    | c.2356A>G        | p.M786V    | 47.37        | 52.17        |
| 141813647          | <i>PTK2</i>     | NM_005607    | c.1036C>T        | p.P346S    | 47.22        | 41.46        |
| 144810414          | <i>FAM83H</i>   | NM_198488    | c.1217C>A        | p.A406D    | 43.75        | 39.13        |
| 134351730          | <i>PRRC2B</i>   | NM_013318    | c.4214T>G        | p.L1405R   | 40.00        | 69.23        |
| 139265345          | <i>CARD9</i>    | NM_052814    | c.575A>G         | p.Q192R    | 59.09        | 50.00        |
| 96162517           | <i>TBC1D12</i>  | NM_015188    | c.147_164del     | p.49_55del | 46.15        | 30.77        |
| 3141665            | <i>OSBPL5</i>   | NM_020896    | c.592G>A         | p.V198I    | 60.47        | 42.86        |
| 7712604            | <i>OVCH2</i>    | NM_198185    | c.1535C>G        | p.T512S    | 51.85        | 53.85        |
| 10862595           | <i>YBX3</i>     | NM_003651    | c.692A>C         | p.Q231P    | 60.71        | 40.00        |
| 15777273           | <i>EPS8</i>     | NM_004447    | c.2113G>A        | p.A705T    | 45.45        | 57.14        |

|                |                     |                  |                   |                |              |              |
|----------------|---------------------|------------------|-------------------|----------------|--------------|--------------|
| 26217934       | <i>RASSF8</i>       | NM_001164747     | c.607G>C          | p.E203Q        | 51.43        | 48.89        |
| 96379884       | <i>HAL</i>          | NM_001258334     | c.1106G>A         | p.R369Q        | 53.85        | 50.00        |
| 123057763      | <i>KNTC1</i>        | NM_014708        | c.2214G>C         | p.E738D        | 52.54        | 51.72        |
| <b>4835997</b> | <b><i>GP1BA</i></b> | <b>NM_000173</b> | <b>c.98G&gt;A</b> | <b>p.C33Y</b>  | <b>55.00</b> | <b>60.00</b> |
| 74003318       | <i>EVPL</i>         | NM_001320747     | c.6034C>T         | p.R2012W       | 64.71        | 40.74        |
| 78306001       | <i>RNF213</i>       | NM_001256071     | c.3713G>A         | p.R1238Q       | 47.27        | 68.29        |
| 7049171        | <i>LAMA1</i>        | NM_005559        | c.674G>A          | p.R225H        | 47.06        | 39.66        |
| 8825397        | <i>MTCL1</i>        | NM_015210        | c.3889T>C         | p.S1297P       | 41.38        | 50.00        |
| 8825398        | <i>MTCL1</i>        | NM_015210        | c.3890C>T         | p.S1297F       | 39.29        | 51.35        |
| 54423856       | <i>WDR7</i>         | NM_015285        | c.2032G>T         | p.A678S        | 34.21        | 50.00        |
| 17212814       | <i>MYO9B</i>        | NM_001130065     | c.287A>G          | p.Q96R         | 42.22        | 53.85        |
| 18980866       | <i>GDF1</i>         | NM_001492        | c.251G>A          | p.G84E         | 50.00        | 50.00        |
| 19033544       | <i>DDX49</i>        | NM_019070        | c.767A>G          | p.N256S        | 41.38        | 60.00        |
| 43990796       | <i>PHLDB3</i>       | NM_198850        | c.1393G>A         | p.A465T        | 39.39        | 54.84        |
| 53116748       | <i>ZNF83</i>        | NM_001348019     | c.1070A>G         | p.N357S        | 50.91        | 53.33        |
| 53912045       | <i>ZNF765</i>       | NM_001040185     | c.1237T>G         | p.C413G        | 34.25        | 39.47        |
| 42315606       | <i>MYBL2</i>        | NM_002466        | c.394G>C          | p.E132Q        | 48.75        | 60.00        |
| 153220494      | <i>HCFC1</i>        | NM_005334        | c.3270_3356del    | p.1090_1119del | 48.65        | 56.25        |

VAf – variant allele frequency

**Table S3.** Mean fluorescence intensity of antigens expression on platelets in patients II-1, II-2 and one healthy individual III-3.

| MFI           | II-1  |       | II-2  |       | III-3 |       |
|---------------|-------|-------|-------|-------|-------|-------|
| FSC           | 4566  |       | 7118  |       | 4480  |       |
| CD41          | 14431 | 99.3% | 13253 | 99.3% | 12656 | 99.6% |
| CD61          | 4886  | 99.3% | 7468  | 99.3% | 3406  | 99.6% |
| CD42a (GPIX)  | 1814  | 98.9% | 3005  | 98.9% | 3803  | 99.6% |
| CD42b (GPIbα) | 1113  | 98.5% | 4287  | 98.9% | 4622  | 99.4% |
| CD9           | 1236  | 50.4% | 1082  | 54.1% | 5560  | 99.6% |

Mean fluorescence intensity (MFI), forward scatter (FSC); reference limits for percentage values (in-house reference level): CD41- 80-99%, CD61- 75-99%, CD42a- 66-99%, CD42b- 70-98%, cut-of limit for MFI >100.

**Table S4.** Virtual panel of inherited thrombocytopenia related genes based on the literature review [27].

|          |           |         |          |           |          |          |         |
|----------|-----------|---------|----------|-----------|----------|----------|---------|
| ABCA12   | BLOC1S2   | FHOD1   | ITGA2    | MYO3A     | PPP1CB   | RASGRP2  | STXBP4  |
| ABCB4    | BLOC1S3   | FLI1    | ITGA2B   | MYO5A     | PPP1CC   | RBM8A    | STXBP5L |
| ABCC4    | BLOC1S4   | FLII    | ITGA5    | MYO5B     | PPP1R12A | RGS10    | STXBP6  |
| ABCG5    | BLOC1S5   | FLNA    | ITGB1    | NAPA      | PPP1R12C | RGS18    | SUZ12   |
| ABCG8    | BLOC1S6   | FMNL1   | ITGB3    | NAPG      | PPP1R14A | RGS19    | SYK     |
| ACSL4    | BMP4      | FMNL3   | ITPR1    | NBEA      | PPP1R2   | RGS20    | SYTL3   |
| ACTN1    | BTBD9     | FRMPD1  | JAK2     | NBEAL2    | PRKACA   | RGS9     | SYTL4   |
| ACVRL1   | BTK       | FYB     | JMJD1C   | NFE2      | PRKACB   | RHOA     | TAL1    |
| ADAMTS13 | C14orf133 | FYN     | KIAA1109 | NIPSNAP3A | PRKACG   | RHOC     | TAOK1   |
| ADCY3    | C19orf55  | GATA1   | KIAA2018 | NOTCH1    | PRKAR1A  | RHOF     | TBXA2R  |
| ADCY6    | C20orf42  | GDI2    | LAIR1    | NOX1      | PRKAR2A  | ROCK1    | TEC     |
| ADCY7    | C6orf25   | GFI1    | LAT      | NRG3      | PRKCA    | ROCK2    | TGFBR3  |
| ADORA2B  | CD226     | GFI1B   | LCP2     | NSF       | PRKCB    | RUNX1    | THPO    |
| ADRA2A   | CD36      | GNAI2   | LPAR1    | NXF1      | PRKCD    | SCAMP2   | TLN1    |
| ADRA2B   | CLEC1B    | GNAI3   | LTBP1    | ORAI1     | PRKCQ    | SCAMP5   | TLR2    |
| ADRBK1   | CLEC4F    | GNAI1   | LY6G6F   | P2RX1     | PRKD1    | SCFD1    | TMCC2   |
| AK3      | CNO       | GNAI2   | LYN      | P2RY1     | PRKG1    | SELP     | TPM1    |
| AKT1     | CSK       | GNAQ    | LYST     | P2RY12    | PRKG2    | SERPINE2 | TPM4    |
| AKT2     | CTTN      | GNAZ    | MAP2K2   | P2RY13    | PTEN     | SH2B3    | TRAF4   |
| ALOX12   | CYCS      | GNB2    | MAP2K4   | PADI2     | PTGIR    | SIRPA    | TREML1  |
| ANKRD12  | DAAM1     | GNB3    | MAP3K9   | PDE2A     | PTGS1    | SLC35D3  | TRPM7   |
| ANKRD18A | DIAPH1    | GNE     | MAPK1    | PDE3A     | PTK2     | SLC9A3R1 | TTC37   |
| ANKRD18B | DIAPH2    | GNG11   | MAPK13   | PDE4D     | PTPN1    | SLC9A3R2 | TTF2    |
| ANKRD26  | DIAPH3    | GNG12   | MAPK14   | PDE5A     | PTPN11   | SLFN14   | TUBA3C  |
| ANKRD33  | DNAH11    | GNG13   | MAPK8    | PDPK1     | PTPN12   | SMAD1    | TUBB1   |
| AP3B1    | DNM1L     | GNG5    | MDS1     | PDZD3     | PTPN18   | SMAD6    | UNC13A  |
| AP3D1    | DNM2      | GP1BA   | MECOM    | PDZK1     | PTPN2    | SNAP23   | UNC13B  |
| AP3M1    | DNM3      | GP1BB   | MKL1     | PEAR1     | PTPN6    | SNAP25   | VAMP2   |
| AP3S1    | DTNBP1    | GP5     | MLK1     | PECAM1    | PTPN7    | SNAP29   | VAMP3   |
| APC      | EFNB1     | GP6     | MLPH     | PGM3      | PTPN9    | SNAPIN   | VAMP7   |
| ARHGAP1  | EPHA4     | GP9     | MMP17    | PHOX2A    | PTPRA    | SNX1     | VAMP8   |
| ARHGAP17 | EPHB1     | GRAP2   | MNX1     | PIK3CA    | PTPRC    | SRA1     | VAV1    |
| ARHGAP32 | ERG       | GRB2    | MPL      | PIK3CB    | PTPRJ    | SRC      | VAV2    |
| ARHGAP6  | ETS1      | GRK5    | MRPS34   | PIK3CD    | RAB27A   | SRF      | VAV3    |
| ARHGDIA  | ETV6      | GRK6    | MUC16    | PIK3CG    | RAB27B   | STIM1    | VPS11   |
| ARHGDIB  | EXOC1     | GUCY1A3 | MUC2     | PIK3R1    | RAB38    | STOM     | VPS16   |

|                 |               |                |               |                |                 |               |               |
|-----------------|---------------|----------------|---------------|----------------|-----------------|---------------|---------------|
| <i>ARHGEF12</i> | <i>F2R</i>    | <i>GUCY1B3</i> | <i>MUTED</i>  | <i>PIK3R3</i>  | <i>RAB4A</i>    | <i>STX11</i>  | <i>VPS18</i>  |
| <i>ARHGEF3</i>  | <i>F2RL3</i>  | <i>HBB</i>     | <i>MYB</i>    | <i>PIK3R5</i>  | <i>RABGGTA</i>  | <i>STX12</i>  | <i>VPS33A</i> |
| <i>ARRB1</i>    | <i>FARP2</i>  | <i>HOOK3</i>   | <i>MYH10</i>  | <i>PLA2G4A</i> | <i>RAC1</i>     | <i>STX2</i>   | <i>VPS33B</i> |
| <i>ASPN</i>     | <i>FCER1G</i> | <i>HOXA11</i>  | <i>MYH13</i>  | <i>PLA2G4C</i> | <i>RAF1</i>     | <i>STX4</i>   | <i>VPS39</i>  |
| <i>BAK1</i>     | <i>FCGR2A</i> | <i>HPS1</i>    | <i>MYH9</i>   | <i>PLCB2</i>   | <i>RAI1</i>     | <i>STX6</i>   | <i>VPS41</i>  |
| <i>BCL2L1</i>   | <i>FERMT1</i> | <i>HPS4</i>    | <i>MYL9</i>   | <i>PLCB3</i>   | <i>RAP1B</i>    | <i>STX7</i>   | <i>VPS4B</i>  |
| <i>BCOR</i>     | <i>FERMT3</i> | <i>HTR2A</i>   | <i>MYLK</i>   | <i>PLCG2</i>   | <i>RAP1GAP</i>  | <i>STXBP1</i> | <i>VPS52</i>  |
| <i>BET1L</i>    | <i>FGD3</i>   | <i>CHD3</i>    | <i>MYLK2</i>  | <i>PLDN</i>    | <i>RAP1GAP2</i> | <i>STXBP2</i> | <i>VPS8</i>   |
| <i>BLOC1S1</i>  | <i>FGR</i>    | <i>INPP5D</i>  | <i>MYO18B</i> | <i>PPP1CA</i>  | <i>RAP1GDS1</i> | <i>STXBP3</i> | <i>VWF</i>    |
|                 |               |                |               |                | <i>ZFPMI</i>    | <i>WDR66</i>  | <i>WAS</i>    |

**Table S5.** The reference limits and maximum aggregation results in the patients II-1 and II-2 (2017).

| <b>Name of agonists</b>                      | <b>Reference limits</b> | <b>Patient II-1</b> | <b>Patient II-2</b> |
|----------------------------------------------|-------------------------|---------------------|---------------------|
| Platelet count in PRP (* 10 <sup>9</sup> /L) | 150-300                 | 58                  | 102                 |
| Platelet count in PPP (* 10 <sup>9</sup> /L) | 0-20                    | 0                   | 1                   |
| <b>Aggregation - collagen</b>                |                         |                     |                     |
| Collagen 2 - Amax (%)                        | 74.5 - 87.3             | 23.7                | 71.5                |
| Collagen 5 - Amax (%)                        | 74.7 - 88.9             | 45.3                | 75.8                |
| <b>Aggregation - ADP</b>                     |                         |                     |                     |
| ADP 5 - Amax (%)                             | 57.0 - 86.2             | 28                  | 48.9                |
| ADP 5 - disaggregation (%)                   | 0 - 10.0                |                     |                     |
| ADP 10 - Amax (%)                            | 66.6 - 90.7             | 31.3                | 69.1                |
| ADP 10 - disaggregation (%)                  | 0 - 10.0                |                     |                     |
| <b>Aggregation - ristocetin</b>              |                         |                     |                     |
| Ristocetin - Amax (%)                        | 77.8 - 97.1             | 20.2                | 20.3                |
| Ristocetin correction - Amax(%)              | N.A.                    | 39.5                | 36.4                |
| Low ristocetin - Amax (%)                    | 0.2 - 4.7               | 1.4                 | 2.5                 |
| <b>Aggregation - arachidonic acid</b>        |                         |                     |                     |
| Arachidonic acid - Amax (%)                  | 73.2 - 89.6             | 6.7                 | 71.5                |
| Spontaneous aggregation                      | less than 5             | N.D.                | N.D.                |

The reference limits were determined based on the results of the 2.5 - 97.5 percentile. Reference aggregation limits were obtained from 50 peripheral blood donors. Not applicable N.A., not done N.D.
